# Supplementary material for: Arabidopsis sucrose synthase localization indicates a primary role in sucrose translocation in phloem
Source: PubMed Central journal article supplement (PMC7242074; doi:10.1093/jxb/erz539), 2019-12-05
Supplement: erz539_suppl_supplementary_tables_s1-s4.pdf [file erz539_suppl_supplementary_tables_s1-s4.pdf]

### Movie S1.

Motility of AtSuSy4-YFP in the companion cells of longitudinal sections of leaf petioles. Time-lapse video showing that AtSuSy4-YFP fluorescence was streaming in the cytoplasm of companion cells. Movie was acquired at 5-second intervals for total 1:35 minutes. Bar=10  $\mu$ m.

### Movie S2.

AtSuSy5-YFP was shown to be immobile in the sieve elements of petiole longitudinal sections. Time-lapse video showing that AtSuSy5-YFP fluorescence was parietally localized in sieve elements and YFP signal was immobile as indicated by arrowheads. Movie was acquired at 5 seconds intervals for total 1:35 minutes. Bar=10  $\mu$ m.

**Table S1.** Primers employed for real-time quantitative PCR analysis.

| Gene                     | Orientation | Primer sequences (5' to 3') |
|--------------------------|-------------|-----------------------------|
| <i>SuSy1</i> (At5g20830) | Forward     | TTGCCTGAACAAACCCGGAA        |
|                          | Reverse     | A CCTCACAGCTAGAGCAACCC      |
| <i>SuSy4</i> (At3g43190) | Forward     | AAGGAATCGTTCGCAAATGG        |
|                          | Reverse     | TTTCAGCGGCAACATCCTC         |
| <i>CesA4</i> (At5g44030) | Forward     | GTCTGTGGCGATGAGGTCAA        |
|                          | Reverse     | AGAGTGTTGCATTGAGGGCA        |
| <i>CesA7</i> (At5g17420) | Forward     | GTGGTGTTCCTCCGTCATCA        |
|                          | Reverse     | CAGCTCAGTTCCCCACTCAG        |
| <i>CesA8</i> (At4g18780) | Forward     | AGAGAACGCATTGGTGAGGG        |
|                          | Reverse     | CGCACGGCTTTGCTATTGTT        |
| <i>UBQ5</i> (At3g62250)  | Forward     | CAGCTCCACAGTTGCGTTA         |
|                          | Reverse     | CAAGCCGAAGAAGATCAAGCACAAG   |

**Table S2.** Primers employed for the amplification of SuSy coding sequences.

| Gene                     | Orientation | Primer sequences (5' to 3') |
|--------------------------|-------------|-----------------------------|
| <i>SuSy1</i> (At5g20830) | Forward     | CACCATGGCAAACGCTGAACGTAT    |
|                          | Reverse     | ATCATCTTGTGCAAGAGGAAC       |
| <i>SuSy2</i> (At5g49190) | Forward     | ATGCCGACTGGTAGGTTTCGAGACTAT |
|                          | Reverse     | GTTCTCATCTGTTGCCAGCGGGATTG  |
| <i>SuSy3</i> (At4g02280) | Forward     | ATGGCAAACCCTAAGCTCACTAGGG   |
|                          | Reverse     | GTCATCGGCGGTTGAAGGAACAG     |
| <i>SuSy4</i> (At3g43190) | Forward     | CACCATGGCAAACGCAGAA         |
|                          | Reverse     | CTCTTCATGAGCAAGAGGAACA      |
| <i>SuSy5</i> (At5g37180) | Forward     | ATGGAAATGACATCTGGATCG       |
|                          | Reverse     | AGCACCAAACAACCTGAAACTC      |
| <i>SuSy6</i> (At1g73370) | Forward     | ATGTCATCTTCATCTCAAGCTATGC   |
|                          | Reverse     | ATACTCTTGAGCCGAGTTAGCACC    |

**Table S3.** Primers used for the amplification of SuSy promoter fragments.

| Gene         | Promoter size | Restriction sites added        | Orientation | Primer sequences (5' to 3')   |
|--------------|---------------|--------------------------------|-------------|-------------------------------|
| <i>SuSy1</i> | 2090 bp       | <i>Cl</i> aI                   | Forward     | TCTATCGATAAGTCAAGGTTAATC      |
|              |               | <i>Av</i> rII ( <i>X</i> majI) | Reverse     | GCGCCTAGGTGATCCAAAAAAGA       |
| <i>SuSy2</i> | 600 bp        | <i>P</i> meI ( <i>M</i> ssI)   | Forward     | CTCGTTTAAACCGACTAAAGAATTCTG   |
|              |               | <i>S</i> peI                   | Reverse     | CGCACTAGTGATTTTTTCTCAGAGG     |
| <i>SuSy3</i> | 1394 bp       | <i>P</i> meI                   | Forward     | CTCGTTTAAACCCGGATTGCCTCTATA   |
|              |               | <i>S</i> peI                   | Reverse     | GCGACTAGTGAATATTCAGATGATCA    |
| <i>SuSy4</i> | 1959 bp       | <i>Cl</i> aI                   | Forward     | GTGATCGATTTCTTCAACAAAGCCCTTCA |
|              |               | <i>Av</i> rII ( <i>X</i> majI) | Reverse     | CCTAGGTTCAAACACAATCACAAAGC    |
| <i>SuSy5</i> | 1731 bp       | <i>S</i> acI                   | Forward     | CTAGAGCTCAATGCTCATTGCTCG      |
|              |               | <i>S</i> peI                   | Reverse     | GCGACTAGTTGTGTTATGTACCTTG     |
| <i>SuSy6</i> | 686 bp        | <i>P</i> meI                   | Forward     | CTCGTTTAAACACACAACAACGAAAGAG  |
|              |               | <i>S</i> peI                   | Reverse     | CGCACTAGTAGAAACAACCTGAAGATTC  |

**AtSuSy1 promoter fragment (2090bp):**

atcgatAAGTCAAGGTTAATCAAGAAGTTAGGACTAGTTAATTGAACTAAAGAAAGGAAAAGAAAAAAA  
GATTTGTAAAACCTGGAATTAATTATTTTCTTGAAAAGGTCAAAAAGGAAAACGTGGGATATATAGTT  
GCAGCTTATTCATCAAACAGTTACAAGTTTTTTATTAATAAATTAGCAAAAACAAAACAAAAAAAACAA

CACATAACTTTTACAATTTATAATATAAAATAAAATAAACTTTTGGGTTGAAAAGTTAATTTAACATTAAT  
ATTTAAATATTTTGAATTGCAAAATATTTGAGAATTAATAAAACTTTTTTTTTGCATTTATTGGAAATTA  
AATAAACCTTAAACTAATACTTTAGATCATTTCATATTTAGTCAAAAATTATTCAACAAACTTTTATTA  
CAATGATTCATTTAATTGTATCAAACAAAATTTCCATAGAGTCAAACCTTATAATTTATATGTTTAAAA  
GCTGTATTTTTTTTTACTTTGGTTTTAAATATGATATTTGTGTGTAATTAATTTTTCTTGTTTGTCAAGTA  
TTATTAAGATAGAGAGATATTATTTTCATATCATCAAATGTAAATGTCTTGTTAATCCAATTATCCAAAG  
ATCAGTGACATATCCGATATATCTATTCTATTTAAAGGAAAAAACATTTAGTGATTGTTTTATTATAA  
CATTTAAGGAAAATGTACACTATTCAGAACTTTCCATTTTTCTTAAAACACCCTTTTCCCTGGACTTTTA  
AATCCATTATATTTAGTCTTCTGGGTTTGGAGCCCAAGAAATAAAACGTAGAAGGAAACAGAGGGAA  
GTAAATGATTCATATCAGCTTACCAAATTTGTATCAAGCTTTAAAAATTCGTCTCTCTATAAATCTGA  
AACATATTGAACATTAACCTCCACATCTCACTCAAACCACTTCTCTATACTCCAGGTTCAATTTCTTCTT  
CTTTAATCTTTAAAGTTTGGTTTTAAAGTTTTTCTGATACATTTAGTTTAATCATTTTTTCGTTCTTATGATA  
GTTAACGAAACAAGTTTTTGTGTTTATTTTTCTGACAAAAAAGCAGAAAAATAAGATGAATCAAACAA  
CATCTTGTTCTTTTTCTTAGAAAATCTTGCCTGAAAAATCTCTGGTTAGTAAAAAACACCAAAACGT  
TTTTATATTCTAAAGAATCAGTCGTGATTTGTATTCTATTTTATCGCTTTTTAATTTTTTTAGAGGAATTT  
TCTCATAGAGAATTTTCCAGCTGTGTTGCAGAAACAAAAGAATGTCACGTCCAACATTTTCTTTAATT  
TAGTAAACATTTTCGGAAAAATCTTTTGCATTATGAACCATTTTCTCCGATAATAAAACTCCAATA  
AGGAATCCACTATAGAGACTTTTGACTGTTCAAGAACTCAAATATATGTTTAGTTTTCCCTTTACAA  
TCATAATTTCTTTAATGTACTGTATGACGTGTACCAGGATTCTTATTCTTGTCTTTATTTTACATGTCTG  
CATCCAACCTTTTTTATATGTCACACACTTGGAAATTAATTTGACGAAGATGTTTTGTAACCTTGATGGA  
TTCCTAAACACCATTCTTTAAATGGATGGTGGATAGGAAACGTTTAAACCAAAAACTAATGAATTT  
GATGGATAAGATTGTTCTTTAAACATCAATTTCAATTTGTAAAACAATGTCCTATGTCGGCTAGAAAAT  
ATATTAGTCAAAAACGAATTTTGGTTTCGCCATGTGTACATGTAGAGGTCAAGTACGTGAATATAATA  
ACAACCTCTAGCTCTTAGCTCTACTGCTCTAGGCTTGTTTCGTAAAACCTTGGAAAGCTTGAAGGCTAAA  
AGCGTAAAAGAAAAGTCATGTTTTCAATAAATTTCTTGACTTTTAGTTATAATATCTTGACCTTTGTTAT  
AATATCTAACCCATAGTTTTTCTTTATATATAATGTGAATATGGAAAACACAAGACTTCATCTTATATT  
CATCAATCTTATTCTTATTTTCTCTCTGCAGTTTTCAAAAACCTTCTCACTGTTATCTGCGTCTCTTTTTT  
GGATCAcctagg

**AtSuSy2 promoter fragment (600bp):**

CGACTAAAGAATTCTGATTTAATTTTGTGGTTTATATGTTGAGTTAACTGTTAAGAGAGTTTTATTTTGT  
AATAGGTGTATCAGTCAATAAACAATCTTTGTATCAACCAAATGTAATTTTTCTCGTTAATTCGATTTT  
AGAGTTTTTACTTTAAGATAAACAACCTTTTCACACATCATTTAATGAAAGTGGAGAAGCTTAAAAA  
ACAAACAAAGAACTGATCCATTTTTGGCGGGTCTTCTTCTACTCTTATTCATATGTGTTAACGAAC  
TAGCGTAAAATTCAGAGCAAGCGATCTCCGATTTGAACGTGGCTATCACCGGAGGCCACCACTACGG  
GCGATACGCTCTAAGTGAGGATTAAGTGCTCTGGTGGTGACGTTGAAGAACTCGCCATGGTTTTT  
GTTATCTCTGCAGCCAAGTGTCGTTCTTTCTTCGCCACTTCTCATCAAGCTACAGTGAATTTAAAAATG

CGCTCTTTCTTTGATCTCGTATACATAAGCTGGATTGGTTTCTTAAACAAATTCCTCTCCTTTTGGGTCT  
TCTGGGTTTGCCTTGTAAGTGTGTTTTGCTCTGAGAAAAATC

**AtSuSy3 promoter fragment (1394bp):**

CCGGATTGCCTCTATACATATGATAAAGTTCTAACAAGAAACGGGTCATCTCGTCTGACCAAATAATTT  
TCTAATCGAGAAAACAAATCAAACATGTATTCAATCAAAAACTCAAAAAATACAAAATAAATAA  
AATGACGATGCCATAAAATACTCAGAGAATTACACTAGCTAATGAATGGATGAAAGGATAGATCATA  
CTTACGTTTGATTCTTGATTTTGATTTTGATTTTCGTTAGTTTGGGTAGATGCCATAATTGAGAGAATAG  
GGTTCAATATATTGATTAGGATTTTCTGATAAGAATAAGATATATAGGGTTTGGGTGGAAGACATAA  
TTATTTTAGTTAATTAATAAAAAAAAAAATTAACCTAACCGCTACCGCCCGCAACCGCAAACGCTTGCGGG  
AAGGAACTTTTAAATATGGCGATTTTCGAGCGGTCCAAAGCGGTATCTAACGGTTTTTATGATTGGTGT  
CAAACGCTAACAACTGCTACCACCCGCAAACGCAGCGTTTGCGGGTGACAGAGGGAGAACCAATCAA  
GCTCTAAGACTAATCGGACCAATTTAGCAACTTGTGTGCTTCGATGTGTTGGACTGGGCTAGATTGGGC  
CCAAATAGCCTGTTTTAACATTCCCAAAGATCCAAACAATTCCTTCTTCTTCTTCCGAACAATTCAAT  
GTAGATCCGAGCGAATCTCCTAAATTAATAAATGCACAATTGTGCTCAGCTTACCAAAAAGGCCCAA  
AAGACCAAACATATTCTGATTTTTTCTCTTTAGATAACAATAAAAGTAATTTATATAGATTAGAGGCC  
AATAAGGTTACGTAGGCCAAACATATTAAGTAAGTAACTCAGAAGAGATCCATCAAAATTTGATTCA  
CACATCTGTTTAGGAATTAATAAATATTTGATCGGTTATTCATTCTTTTCATGAAATCATGCAAAA  
AATCAAAAATCATTTTTTCTCTAGAACTACGTGGCGAGAAAGCAGAGCACCAGTTGTCTTCTTGCTC  
TGATTATCTCGTTGAAACCGCTTTCAAAGCAGAGCAAAAGAGACGACACCGGAGCCTCCACTGCTTTA  
CTTTTCTTTAACTGTGACTGCTTTTATATAATAAATAACATACTCTCAGAGTCACATGTACT  
CTCCTTAACATAAACACGTCCTTGTAGCGAAAACAGTATCAAGAAAAAGAGAAGATCAAACACGT  
CTTCTTTTCTCTCTCTCTTTGTGCGCTAAAATTCAGAATCACTCTGCTTTTTACCCTTTTAATCAATG  
ATTTTTCTTTTAGTAGCAATCGTTGGTGATTTCGAAAACCAAACCTTTCTCGGACTAGGATTCTAGGG  
TTTTAGTGATCATCTGAATATTC

**AtSuSy4 promoter fragment (1959bp):**

atcgatTTCTTCAACAAAGCCCTTCACGGCCCCACTGCCATACACACAAACAAGTGACAAGCAATTTGA  
ATCCATTTGATTAAATTTAATATCTTAAGCAAATTAATAAACAAGAAAACAAAACTAGCTTGCTC  
GTGGTAGTCTTGAAACCGTTGTTTTGTATGCCATAGTTTACTGATGTTATTTTCTTTGGTTACTTTACT  
TATTAGTTTATTGACAAATTTGACATTATGATTACAATAGTGAAGCTTGGTTAATTAATTACTTTATT  
GACATAATTATATATAATAAATAATGAAGAAATTGTATGTTTTACACGCAGTACTCGATAACCAATA  
GAATCCTTTTTCTGTGGATCAGTATTGAGTATTGACCCGTGGGTATTGACCAACTACTTACAATTATTA  
TAACTTAAAACAAAATTTGTATCTCTCTAAACAAAGCATAATTAGTATTAAGAAAACCAAGTTGTCGA  
AGAGAAGAGAGACTAGTATAAATGATCCAACAAAGCTATTCAAATCTTCACACTTCACTACTTATC  
ATTTCTCTTCTCATACTTTTCTCAAATTTGCAATAGCTCCCTCCATCTTTTCGCTTCATTCACTACATAT  
TTCTAGTGACCTCCTTCGCCAGTGACTTTCCGTAGCAATTTAAGGTAATCTATTCTTGTAATGTATTATA

ATGAGAGGTTATAAGGTTTCAATGATTAGTTTATGAAAATTTTTAATGCTCTGAATGTTTATGA  
CATGCTAAACATTAGAACCTTCAAATATTTTTAGTTGAGTATGGTTAAAAAAGGTTTCACTGCTAATTA  
ATTGATTTTTTTTTGGAAAAGTAAATCAATGGATTTTTGATTTCATTTTTTTTTATCTAGCAACACTAAA  
AATAGAATTATATACTCGGACATTTTTCCGACACATGTAACATCGCTTAGCCTAAACTAACTATTTAA  
CTTTTTGTGATTGGTGGTAAGAGGAAATTTAAAGCTTTTTAGAGGGAATATGCTTTGAAAGATTCTTT  
AATAGTGTCAATTTACTTTAGGATAAGAATAAAAATTAGCATTGTCGTAAAAAGCATGCAACAAACACAT  
TATAAACTTTTTCTTCTTCTAAGAAAATAATTCAATTTAACAATTTAAGTTATTCGCTAATATATATATAT  
ATATATTTTTACAAAATTTTCAGCTAACAAATCATGTTTTTCATTTTTTTGTTTTTGTAAATATGATAATC  
TTTCAATATATTTACTTTAGCTACTTTACGTTCCACAAAATATAAAAATTTCTTTTAATCAACAATAGA  
TGTAAGATTTGATACCAAAAAATTTCTTGTTCATCAAGACAAATTAATGATTTATTTATATTTATTAATT  
AATATTAATTTTTCTTGATCTATGTGATAAAAATAAAAAAGATCTTTTTTATTTTAGATATTTTAGAATGA  
TTCAGAAAATAAAACCAATAGCGTATATTCTGTTCTACTCGTCTTCTAATTTTGAAAATAATATTTTCA  
CAGAGAATTTCCAGCTATATGTCGAAATCTTTTGTATTTTTTTTTGCTATAAAAGAAAATTCGTTGAAT  
TACTTTAATTCATGGTTTGATTTATCTTTTCTCCATTACTTATTTGAGAAGCCATAAACACCGCTGCTT  
TGAAATGGATACTGGATGCAAAATGTTTTAAAGAACTTAAATTGGACAGAATAAAGATGATTCTTTCA  
ATATTTTATGTTGGAAAATATATATAATCAATTAATCATCTAACTTTAAAAAGTTAAGATAATTTTTGT  
ATGATGGAATTTAACTAACTTTTTTCATAAGTCATAATCAATTTTTCTTATATAGGCAAGCATTTTGA  
ATTAACCTCTCTCCATTATCTTACTACATTTCTTCATCTTCTTATTCTCTGCAGTTTCAAAGCTTTGTGA  
TTGTGTTTGA

Acctagg

**AtSuSy5 promoter fragment (1731bp):**

AATGCTCATTGCTCGTAGTTTAAAGCCACATAAAATCTCTAGTAATCAATTGGAAGGATGATAAAGA  
AATAGTTTGGAGTATAAGGAAGATGTTTAATTGAATTTAAGTTTGGTTTGGAAATAAGAGCTTCGGAGAA  
ATGTACATAAGTTTTCTCAAAGAAGTAAAGATCTTACATAACGATGACATGTAACATTTGAGCTTCA  
AATACAATGATCATTATATTGTTTTGCAGATTGGCGATTGCATTGAATTAGAAACCAAAAAAAAAATAT  
ATATATATATATATGTTCTTTACTTCATTTGTATGGTCCACTTTTAGATCCTTTACTTCATCGTCTCTCT  
ACTTTTGGAAATTTCTTTGCTTTTCTCTCTTCATCTACTACATAGAATCAAAAATGAAAACATCTTTTT  
TTTACTCAATATTTACTCGTACTGACCTTGTCTTTAATCTCTTTGTATTACTAAGTTTATGCTTCATGTG  
ACAAAAAAAAAAACAAAGATATAATAGACTGCCTATTTCTGTATATTTTCAGGTGATCATATTCTTATTT  
CAGGTGAAAGAGAAGGAGAAACACAATTTTCAACCACAAAAAATACTTATCCGTAATTCTTATATTCCG  
ACAAAATATTTGTTACTACTACCACTAATCTGATAATCATATATTACAGTTTTTTGTTTTTTGGGTATGAAT  
CATATATTATTGTTTTTAGGTTAATGTTACGACATCTAAAACCTAAAAAGCATATTGGATATATACTAA  
TGGATCATTGTCTAGTTCAATATTTTCTCAAAAAAATATGATTTGTGTGAATCTTGGTGGATTTTAAAC  
ATATGTAACAAAGCAAAATTTTGCAGCAATTTAGTGAGATAATTAGAAAACACTAAAACCTTTGAATTG  
ATATCTCGCTTCACATTCAAATGTGAAAACATATATTTTTTACTATTTAAAACATTAATCGAATTTACA  
CGTTTTCAACTGAAAATAATTTCAATCTATGCTATAAATTTAACTTGTGCGAAAATATAGCTAGGTACA  
ACGAAACATCACAAATATACATAAAGAAAAAATCCAGAAAAAAACATTTTGAAAGTTTTTAATGTG

ATTTTCCCTATACTAAATTAATTTAGCATTAAATGATTGTTTTGTAGGAATTTTATCTAGCTAAAATGTT  
CTTACCTAGTAGTTAGAAAAGCATACTAGCTGGATCACTTTTGAAAATGTAATTTTTTTGGTAAGCGTT  
ATGAATGGTAGAAATTAGTTGAGTTATGTTTTCGAAACATAAATATTAATTTGTAAGGGTGATTCAACT  
AAATTAGTTTATTAGTTACATTGATTAATATGTGTGAATATAATGAACCATAACTATGAAAACATCCCA  
GCGAATAAAAATGAGAAAATTTGATCCCAAATTACAAGTAGGTGAGGGCAAGTTTACCCTGACTAAGT  
TACGTACCGTGATTATAATTCTCTCATGTGGCAAGATATTTATTTGGTTAAGTCGTTCTAACAAAGAAG  
AGAAAGCCAAATTAATTAGTTGGAGGACAAAACATGACCTTGCTAAAACGAAAGGTATATGACCCAC  
ACACAATAACATATTCATAGAGATATGTCGTATCTTACCATAGTTCTCCTATAAAAAGTAGACAAAGCT  
GCCATTACGAAACCAATCAAACCAACGCGAAAACCTGCGTTTTATTCTTCTTGTAAATTGGTCTCAAGG  
TACATAACACA

**AtSuSy6 promoter fragment (686bp):**

ACACAACAACGAAAGAGTCTAACCGGCTCAAACCGGTTTGAGTAGCTAGCATATCGATATTCGGTCC  
GATATCCGGTATGTTTTCTCTGGCCGCTTGTTATATTCGGGTACATAATGAAAATCTCAACAAAATTAGT  
TCAGTGTAACCATATGATTAATCAAGTGATGACTTAATTTCTAGACTATAAATTGATCAACTTGAATC  
TTTTTCCAATTGGTACTAATTAATGGATAATTAGTACTGTATAATGATATAATTATTATCTTGCTATAA  
AGTAATTTAGTATCATTGTCCACAGGGACCACAATCTTAAGTAAAGTATCCATCAAAGAGGGGGAAAA  
GGAGCATTCTTTTTGCACCCATACCTTTTATGTTATTAACACATGAACCCCAAGAAAAGCAAAGGTA  
CACAAAATCTGATTTTGCTTCAAACAAAATGAAAATCACGCAATATTCTTTTTTTGTTAACTTGCTTGC  
ACACTTCTTTTCCCCACTTTTATTTCTAACGAATAATCTTCTCCCCATCCTTCTCCTTCTACTCCTGTG  
AGTCCTGTCCCCTTACAGCATATTATTGTGTATCTTTATATATAAAAATGTGGATTAACCATGTTTCA  
ACAAACTACTTCATATCTCAATCATTCAATATTCTTGAAGAGACTTTGAATCTTCAGTTGTTTTCT

**Table S4.** Partial complementation of *sus1/sus4* mutant phenotype by SuSy1- or SuSy4-YFP fusion constructs. 4-week-old WT plants, *sus1/sus4* double mutants, and two independently transformed transgenic SuSy1 and SuSy4 lines subjected to flooding by maintaining degassed water above the surface of soil for 5 consecutive days. The control plants represent plants without flooding and were watered when necessary. Rosette leaf sizes were measured on the first and 5<sup>th</sup> day of growth. Mean (SE) values were calculated from at least 3 individual plants per line. Asterisks indicate significant difference (\* *p*-value < 0.05, \*\* *p*-value < 0.01) of rosette size gain (Column A and Column B) using a Benjamini-Hochberg corrected Student *t*-test.

| Line                                  | Flooding                      |                           |               | Control                       |                           |               | % reduction in rosette size gain<br>(1-A/B)×100 |
|---------------------------------------|-------------------------------|---------------------------|---------------|-------------------------------|---------------------------|---------------|-------------------------------------------------|
|                                       | Rosette size on the first day | Rosette size after 5 days | Size gain (A) | Rosette size on the first day | Rosette size after 5 days | Size gain (B) |                                                 |
| WT                                    | 3.24(0.08)                    | 4.40(0.10)                | 1.16(0.09)    | 3.06(0.14)                    | 4.27(0.13)                | 1.21(0.07)    | 4.71                                            |
| <i>sus1/sus4</i>                      | 2.90(0.11)                    | 3.34(0.09)                | 0.44(0.06)**  | 2.80(0.26)                    | 3.90(0.14)                | 1.10(0.12)    | 60.23                                           |
| <i>SuSy1<sub>pro</sub>SuSy1::YFP1</i> | 2.96(0.16)                    | 3.66(0.09)                | 0.70(0.12)**  | 2.97(0.37)                    | 3.93(0.44)                | 0.97(0.13)    | 27.59                                           |
| <i>SuSy1<sub>pro</sub>SuSy1::YFP2</i> | 2.50(0.15)                    | 3.13(0.15)                | 0.63(0.09)**  | 2.65(0.23)                    | 4.00(0.07)                | 1.35(0.14)    | 53.09                                           |
| <i>SuSy4<sub>pro</sub>SuSy4::YFP1</i> | 3.15(0.06)                    | 3.88(0.13)                | 0.73(0.10)**  | 2.60(0.11)                    | 3.53(0.05)                | 0.93(0.14)    | 21.62                                           |
| <i>SuSy4<sub>pro</sub>SuSy4::YFP2</i> | 3.10(0.17)                    | 4.03(0.22)                | 0.93(0.12)    | 2.68(0.13)                    | 3.70(0.25)                | 1.03(0.19)    | 9.76                                            |
